# Supplementary material for: The Effects of Feedback on Memory Strategies of Younger and Older Adults
Source: PLoS One. 2016 Dec 29;11(12):e0168896. doi: 10.1371/journal.pone.0168896 (PMC5199106; doi:10.1371/journal.pone.0168896)
Supplement: S1 file — (XLSX) [file pone.0168896.s001.xlsx]

## Sheet: study1_old
Hit
Subject ID	baseline	BFB	OFB
1	0.94	0.98	0.82
2	0.91	0.92	0.8
3	0.72	0.94	0.78
4	0.82	0.91	0.8
5	0.84	0.8	0.78
6	0.91	0.91	0.8
7	0.87	0.98	0.84
8	0.84	0.96	0.87
9	0.82	0.89	0.69
10	0.6	0.96	0.93
11	0.84	0.89	0.87
12	0.93	0.89	0.82
13	0.76	0.89	0.84
14	0.73	0.8	0.8
15	0.89	0.84	0.84
16	0.93	0.91	0.96
17	0.84	0.78	0.73
18	0.92	0.71	0.82
19	0.71	0.78	0.71
20	0.93	0.98	0.96
	0.8375	0.886	0.823
	0.0923309	0.0773509	0.0722641
	0.0206458	0.0172962	0.0161588
False alarms of Critical lures
Subject ID	baseline	BFB	OFB
1	0.5686	0.5268	0.4
2	0.3668	0.6998	0.2002
3	0.2332	0.6334	0.4666
4	0.2998	0.3666	0.3998
5	0.4	0.6664	0.3336
6	0.7831	0.4334	0.3998
7	0.2	0.402	0.2688
8	0.1334	0.4	0.1668
9	0.1	0.3666	0.1668
10	0.2332	0.7	0.3666
11	0.4334	0.6334	0.2998
12	0.502	0.5332	0.2992
13	0.0668	0.4	0.3
14	0.2	0.5332	0.2998
15	0.4668	0.3666	0.1002
16	0.2	0.4	0.1668
17	0.3	0.49926	0.1668
18	0.2332	0.3	0.1
19	0.3354	0.5334	0.2666
20	0.2332	0.333	0.1668
	0.314445	0.486353	0.26675
	0.173733	0.127492	0.108047
	0.038848	0.028508	0.0241601
False alarms of new items
Subject ID	baseline	psfeedback	truefeedback
1	0.0666	0.11	0.1332
2	0.0666	0.0664	0.0222
3	0	0.0444	0.0442
4	0.0222	0.1326	0.1328
5	0.0334	0.0664	0.0884
6	0	0.0664	0.11
7	0	0	0.0442
8	0	0	0.0222
9	0	0	0
10	0	0.0666	0
11	0	0	0.0444
12	0	0	0.0222
13	0	0.0222	0.0222
14	0	0.0666	0.0444
15	0	0.0222	0.0222
16	0.0444	0.0222	0.0666
17	0.0222	0	0.0222
18	0	0	0
19	0	0.0222	0.0666
20	0.0222	0	0.0222
	0.01388	0.03541	0.04651
	0.0224587	0.0401616	0.0411672
	0.00502192	0.00898041	0.00920527
Discriminability (A')_item-specific
Subject ID	baseline	BFB	OFB
1	0.810597	0.853581	0.805533
2	0.864303	0.73822	0.875
3	0.826572	0.788386	0.746015
4	0.845454	0.864369	0.791871
5	0.816851	0.64409	0.809519
6	0.682795	0.843053	0.791871
7	0.900692	0.887937	0.867304
8	0.915683	0.876854	0.911926
9	0.920268	0.853095	0.846163
10	0.772616	0.779869	0.875524
11	0.803148	0.746183	0.865975
12	0.832112	0.790609	0.845691
13	0.912484	0.841264	0.855701
14	0.848593	0.726412	0.834999
15	0.816685	0.830151	0.927165
16	0.92562	0.853255	0.94304
17	0.855701	0.728733	0.863224
18	0.909264	0.791503	0.920268
19	0.773572	0.709653	0.807934
20	0.915827	0.906539	0.94304
	0.847442	0.802688	0.856388
	0.0632584	0.0697208	0.0545203
	0.014145	0.01559	0.0121911
Discriminability (A')_Gist
	baseline	BFB	OFB
1	0.855172	0.814877	0.7437
2	0.785012	0.895891	0.767788
3	0.8083	0.886567	0.836801
4	0.802463	0.727017	0.74393
5	0.823942	0.885758	0.750997
6	0.945775	0.809974	0.76262
7	0.8	0.8505	0.767638
8	0.78335	0.85	0.753697
9	0.775	0.84165	0.7917
10	0.8083	0.895863	0.84165
11	0.85835	0.90835	0.779792
12	0.8755	0.8833	0.802273
13	0.7667	0.832719	0.802527
14	0.8	0.843747	0.779792
15	0.8667	0.822916	0.714554
16	0.735207	0.832719	0.677017
17	0.802527	0.874815	0.753697
18	0.8083	0.825	0.775
19	0.83385	0.870297	0.741114
20	0.780148	0.83325	0.753697
	0.81573	0.849261	0.766999
	0.0468287	0.0414612	0.0379421
	0.0104712	0.009271	0.00848411
Response bias (B"D)_item-specific
	baseline	BFB	OFB
1	-0.604693	-0.839793	-0.247516
2	-0.483259	-0.460466	-0.00075
3	0.0627535	-0.596534	-0.180665
4	-0.179398	-0.483171	-0.20028
5	-0.292926	-0.167029	-0.125548
6	-0.354668	-0.511956	-0.20028
7	-0.161703	-0.834362	-0.199195
8	0.0633829	-0.699544	-0.0924399
9	0.237476	-0.403542	0.213163
10	0.14592	-0.663837	-0.577643
11	-0.303368	-0.403542	-0.290316
12	-0.601715	-0.432189	-0.178843
13	0.495045	-0.417271	-0.230766
14	0.0996847	-0.217766	-0.135316
15	-0.432189	-0.277761	0.185587
16	-0.440375	-0.495725	-0.532226
17	-0.230766	-0.182826	0.168815
18	-0.401738	-0.0112927	0.237476
19	-0.0410932	-0.180665	0.0244131
20	-0.484074	-0.82194	-0.532226
	-0.195385	-0.455061	-0.144728
	0.3019	0.238402	0.237597
	0.067507	0.0533083	0.0531283
Response bias (B"D)_Gist
	baseline	BFB	OFB
1	0.595624	0.43603	0.350371
2	0.577719	0.544302	0.761233
3	1	0.691016	0.709777
4	0.812568	0.3375	0.351415
5	0.762862	0.563907	0.467901
6	1	0.596879	0.42047
7	1	1	0.646167
8	1	1	0.729817
9	1	1	1
10	1	0.543185	1
11	1	1	0.66373
12	1	1	0.812373
13	1	0.834111	0.812633
14	1	0.600309	0.66373
15	1	0.829018	0.611912
16	0.580804	0.834111	0.381886
17	0.812633	1	0.729817
18	1	1	1
19	1	0.839558	0.517523
20	0.783497	1	0.729817
	0.896285	0.782496	0.668029
	0.158243	0.223026	0.205826
	0.0353842	0.0498702	0.0460242

## Sheet: Study1_Young
Hit
Subject ID	Baseline	BFB	OFB
101	0.96	0.98	1
102	0.82	0.93	0.91
103	0.98	0.93	0.96
104	0.98	0.89	0.89
105	0.84	0.73	0.76
106	0.89	0.87	0.82
107	0.98	0.96	1
108	0.87	0.82	0.89
109	0.87	0.91	0.89
110	0.8	0.84	0.89
111	0.96	0.96	0.89
112	0.76	0.74	0.76
113	0.89	0.89	0.87
114	0.87	0.82	0.8
115	0.82	0.84	0.8
116	0.91	1	1
117	0.89	0.82	0.87
118	0.91	1	0.93
119	0.84	0.93	0.91
120	0.96	0.98	1
	0.89	0.892	0.892
	0.0652122	0.0806291	0.0765438
	0.0145819	0.0180292	0.0171157
False alarms of critical lures
Subject ID	Baseline	BFB	OFB
101	0.64	0.67	0.44
102	0.2	0.67	0.47
103	0.13	0.07	0.07
104	0.3	0.7	0.43
105	0.2	0.37	0.4
106	0.3	0.37	0.2
107	0.37	0.47	0.2
108	0.43	0.57	0.37
109	0.33	0.57	0.3
110	0.37	0.6	0.27
111	0.3	0.77	0.37
112	0.27	0.3	0.23
113	0.4	0.47	0.27
114	0.2	0.53	0.33
115	0.33	0.47	0.27
116	0.2	0.27	0.23
117	0.37	0.51	0.33
118	0.5	0.8	0.53
119	0.17	0.5	0.3
120	0.17	0.33	0.03
	0.309	0.5005	0.302
	0.125861	0.181325	0.125262
	0.0281434	0.0405455	0.0280094
False alarms of new items
Subject ID	Baseline	BFB	OFB
101	0.0666	0	0.0222
102	0	0.1332	0
103	0.0444	0	0
104	0.0222	0.0444	0
105	0	0	0.02775
106	0	0.0444	0
107	0	0.0222	0
108	0	0.0222	0
109	0	0	0.0666
110	0	0.0222	0
111	0	0.0444	0.0444
112	0.0666	0.0222	0.0222
113	0	0.111	0
114	0	0	0
115	0	0	0
116	0	0	0
117	0.0444	0	0
118	0.0222	0.0222	0.0222
119	0	0.0222	0
120	0.0222	0.0222	0
	0.01443	0.02664	0.0102675
	0.0230878	0.0364428	0.0185629
	0.00516258	0.00814885	0.0041508
Discriminability (A')_Item-specifc
Subject ID	Baseline	BFB	OFB
101	0.802634	0.811695	0.89115
102	0.883702	0.771519	0.830362
103	0.959488	0.964324	0.97063
104	0.915369	0.710767	0.829219
105	0.892238	0.769921	0.76604
106	0.875925	0.841693	0.883628
107	0.897453	0.856519	0.94995
108	0.816307	0.724199	0.853166
109	0.853887	0.793299	0.87606
110	0.806693	0.724304	0.887124
111	0.905715	0.750953	0.853095
112	0.830401	0.806582	0.84316
113	0.841264	0.816002	0.877703
114	0.900623	0.742798	0.820991
115	0.832609	0.789139	0.848601
116	0.917995	0.93335	0.94165
117	0.853025	0.756206	0.853959
118	0.818418	0.798985	0.821452
119	0.904	0.832714	0.885913
120	0.94304	0.906485	0.99165
	0.872539	0.805073	0.873775
	0.0463656	0.0691914	0.0553681
	0.0103677	0.0154717	0.0123807
Discriminability (A')_Gist
Subject ID	Baseline	BFB	OFB
101	0.87676	0.91765	0.842898
102	0.8	0.853887	0.86665
103	0.690075	0.76665	0.7667
104	0.802527	0.905601	0.8583
105	0.8	0.84165	0.828315
106	0.82505	0.804014	0.80005
107	0.8417	0.85229	0.80005
108	0.8583	0.879957	0.8416
109	0.83335	0.891665	0.756923
110	0.8416	0.888967	0.8167
111	0.82495	0.92502	0.804014
112	0.741114	0.802527	0.78022
113	0.85	0.791343	0.81665
114	0.80005	0.8833	0.8333
115	0.833	0.8666	0.81665
116	0.7995	0.81665	0.80835
117	0.804083	0.87655	0.8333
118	0.861062	0.943	0.870297
119	0.7917	0.861118	0.82505
120	0.753697	0.812859	0.75835
	0.811426	0.859065	0.816218
	0.044495	0.0481251	0.0330467
	0.00994938	0.0107611	0.00738946
Response bias (B"D)_item-specific
Subject ID	Baseline	BFB	OFB
101	-0.689792	-0.821048	-1
102	-0.0455526	-0.562852	-0.50931
103	-0.683826	-1.11622e-16	-0.190033
104	-0.812633	-0.360802	-0.426646
105	-0.0987093	-0.0859924	-0.130483
106	-0.360802	-0.335805	-0.0459266
107	-0.829054	-0.708837	-1
108	-0.360337	-0.253556	-0.403446
109	-0.316216	-0.504308	-0.360471
110	-0.18435	-0.292234	-0.329391
111	-0.66373	-0.61478	-0.403542
112	-0.0344431	-0.0457401	0.0155215
113	-0.417271	-0.432379	-0.257464
114	-0.162068	-0.260382	-0.163059
115	-0.205848	-0.309428	-0.100293
116	-0.324898	-1	-1
117	-0.403638	-0.262369	-0.31608
118	-0.510964	-1	-0.600292
119	-0.028594	-0.60172	-0.443876
120	-0.532226	-0.821989	-1
	-0.383248	-0.463711	-0.43324
	0.257263	0.297735	0.329853
	0.0575258	0.0665757	0.0737573
Response bias (B"D)_Gist
Subject ID	Baseline	BFB	OFB
101	0.576083	1	0.837724
102	1	0.316216	1
103	0.463041	1	1
104	0.812633	0.663943	1
105	1	1	0.797858
106	1	0.691016	1
107	1	0.839635	1
108	1	0.837395	1
109	1	1	0.54305
110	1	0.833881	1
111	1	0.61478	0.691016
112	0.517523	0.812633	0.783612
113	1	0.432379	1
114	1	1	1
115	1	1	1
116	1	1	1
117	0.691076	1	1
118	0.840217	0.757806	0.839558
119	1	0.840216	1
120	0.729817	0.821989	1
	0.881519	0.823094	0.924641
	0.184837	0.198862	0.13188
	0.0413309	0.044467	0.0294893

## Sheet: Study2_old
hit
Subject ID	BS	OFB	PFB
2001	0.926	0.852	0.889
2002	0.852	0.593	0.852
2003	0.963	1	0.963
2004	0.889	0.926	0.889
2005	1	1	1
2006	0.740333	0.778	0.889
2007	0.667	0.778	0.852
2008	0.852	0.963	0.889
2009	0.815	0.815	0.889
2010	0.963	0.889	0.889
2011	0.778	0.778	0.926
2012	0.963	0.704	0.852
2013	1	0.852	0.815
2014	0.963	0.926	0.926
2015	1	0.852	0.815
2016	1	0.963	0.926
2017	0.963	1	0.926
2018	0.889	0.778	0.852
2019	0.889	0.889	0.963
2020	0.852	0.815	0.889
2021	0.963	0.852	0.963
2022	0.963	0.926	0.889
2023	1	0.889	0.963
2024	0.926	1	0.815
	0.909014	0.867417	0.896708
	0.0900124	0.102303	0.0511515
	0.0183737	0.0208825	0.0104413
false alarms of critical lures
Subject ID	BS	OFB	PFB
2001	0.500333	0.222333	0.277667
2002	0.166667	0.111	0.166667
2003	0.559	0.333333	0.444333
2004	0.611333	0.389	0.5
2005	0.389	0.444333	0.444333
2006	0.0556667	0.111333	0.666667
2007	0.333333	0.111333	0.222
2008	0.518667	0.389	0.388667
2009	0.388667	0	0.388667
2010	0.444333	0.333	0.777667
2011	0.333333	0.222333	0.333
2012	0.277667	0.111333	0.5
2013	0.277667	0.111333	0.388667
2014	0.555433	0.277667	0.5
2015	0.388667	0.167	0.611
2016	0.277667	0.222333	0.444333
2017	0.333	0.222333	0.611333
2018	0.333	0.0556667	0.333333
2019	0.5	0.222333	0.333333
2020	0.277667	0.0556667	0.333333
2021	0.388667	0.222333	0.388667
2022	0.611	0.222	0.5
2023	0.5	0.222333	0.277667
2024	0.277667	0.222333	0.277667
	0.387435	0.208403	0.421208
	0.139433	0.113739	0.145571
	0.0284617	0.0232169	0.0297145
false alarms of new items
Subject ID	BS	OFB	PFB
2001	0.074	0	0
2002	0.037	0.037	0
2003	0	0.037	0.037
2004	0.037	0.037	0.074
2005	0.037	0	0.037
2006	0	0.037	0.037
2007	0	0.037	0
2008	0.111	0.111	0.037
2009	0	0	0
2010	0.111	0.111	0.111
2011	0	0	0
2012	0	0	0
2013	0	0	0
2014	0	0.037	0.037
2015	0.037	0.037	0.037
2016	0.074	0.037	0
2017	0.074	0.074	0.0555
2018	0	0	0
2019	0	0	0.074
2020	0	0	0.037
2021	0	0	0
2022	0	0	0.037
2023	0.074	0	0
2024	0.037	0	0
	0.0292917	0.0246667	0.0254375
	0.037763	0.0339228	0.0307696
	0.00770833	0.00692445	0.00628082
Discriminability (A')_Item-speicifc
Subject ID	BS	OFB	PFB
2001	0.827896	0.887183	0.883499
2002	0.906695	0.83875	0.906695
2003	0.833906	0.916667	0.868002
2004	0.756686	0.8647	0.803893
2005	0.90275	0.888917	0.888917
2006	0.912459	0.901771	0.729273
2007	0.750187	0.901771	0.887301
2008	0.770939	0.883874	0.845309
2009	0.805123	0.95375	0.845309
2010	0.868002	0.864751	0.656496
2011	0.809638	0.857189	0.882361
2012	0.915111	0.877193	0.779286
2013	0.930583	0.925696	0.805123
2014	0.835	0.899425	0.828011
2015	0.902833	0.90658	0.693682
2016	0.930583	0.930387	0.846746
2017	0.899683	0.944417	0.787355
2018	0.864751	0.923341	0.846691
2019	0.803893	0.901793	0.89959
2020	0.867302	0.933948	0.864637
2021	0.883969	0.887183	0.883969
2022	0.817602	0.916286	0.803893
2023	0.875	0.901793	0.915111
2024	0.899425	0.944417	0.850798
	0.857084	0.902158	0.833414
	0.0547543	0.0294203	0.0666831
	0.0111767	0.0060054	0.0136116
Discriminability (A')_Gist
Subject ID	BS	OFB	PFB
2001	0.828125	0.805583	0.819417
2002	0.728162	0.685877	0.791667
2003	0.88975	0.79918	0.834928
2004	0.883969	0.817602	0.828011
2005	0.817602	0.861083	0.834928
2006	0.763917	0.686214	0.89959
2007	0.833333	0.686214	0.8055
2008	0.811139	0.756841	0.817495
2009	0.847167	1.5	0.847167
2010	0.781285	0.729096	0.901793
2011	0.833333	0.805583	0.83325
2012	0.819417	0.777833	0.875
2013	0.819417	0.777833	0.847167
2014	0.888858	0.779165	0.851697
2015	0.817495	0.728359	0.883874
2016	0.738359	0.756509	0.861083
2017	0.764369	0.706838	0.874427
2018	0.83325	0.763917	0.833333
2019	0.875	0.805583	0.764514
2020	0.819417	0.763917	0.79918
2021	0.847167	0.805583	0.847167
2022	0.90275	0.8055	0.851697
2023	0.828011	0.805583	0.819417
2024	0.779165	0.805583	0.819417
	0.822936	0.800645	0.839238
	0.0466715	0.156007	0.0333077
	0.00952677	0.0318449	0.0067989
Response bias (B"D)_Item-specific
Subject ID	BS	OFB	PFB
2001	-0.56974	-0.156541	-0.340484
2002	-0.0482778	0.419587	-0.0482778
2003	-0.747432	-1	-0.747774
2004	-0.413121	-0.552428	-0.433984
2005	-1	-1	-1
2006	0.570537	0.271587	-0.384988
2007	-0.000250313	0.271587	-0.156018
2008	-0.328826	-0.739263	-0.413121
2009	-0.223569	1	-0.413121
2010	-0.747774	-0.384775	-0.273298
2011	-0.125352	-0.000535917	-0.528453
2012	-0.698297	0.356127	-0.329448
2013	-1	0.120683	-0.223569
2014	-0.747797	-0.490702	-0.56974
2015	-1	-0.0490749	-0.223718
2016	-1	-0.658269	-0.565514
2017	-0.723514	-1	-0.552319
2018	-0.384775	0.533319	-0.275972
2019	-0.433984	-0.273298	-0.723633
2020	-0.227977	0.482963	-0.384988
2021	-0.739192	-0.156541	-0.739192
2022	-0.739263	-0.431902	-0.433984
2023	-1	-0.273298	-0.698297
2024	-0.490702	-1	-0.141722
	-0.534138	-0.196282	-0.441734
	0.393416	0.556354	0.228324
	0.0803057	0.113565	0.0466064
Response bias (B"D)_Gist
Subject ID	BS	OFB	PFB
2001	0.56974	1	1
2002	0.591668	0.469421	1
2003	1	0.723633	0.747774
2004	0.739192	0.739263	0.56974
2005	0.739263	1	0.747774
2006	1	0.470444	0.723633
2007	1	0.470444	1
2008	0.433417	0.41325	0.739192
2009	1	1	1
2010	0.428908	0.384775	0.273298
2011	1	1	1
2012	1	1	1
2013	1	1	1
2014	1	0.698297	0.75051
2015	0.739192	0.592187	0.739263
2016	0.490702	0.658269	1
2017	0.528453	0.432338	0.638515
2018	1	1	1
2019	1	1	0.528634
2020	1	1	0.723633
2021	1	1	1
2022	1	1	0.75051
2023	0.56974	1	1
2024	0.698297	1	1
	0.813691	0.793847	0.83052
	0.221444	0.245471	0.199695
	0.0452021	0.0501066	0.0407627

## Sheet: Study2_FAyoung
hit
Subject ID	BS	OFB	PFB
2101	1	1	1
2102	0.963	0.926	0.963
2103	0.926	0.926	0.963
2104	0.926	0.889	0.926
2105	0.963	1	1
2106	0.889	0.852	0.889
2107	1	0.889	0.926
2108	0.963	0.889	0.852
2109	0.926	0.926	0.815
2110	0.963	0.926	0.963
2111	0.889	0.963	0.926
2112	1	1	0.963
2113	0.963	0.889	0.852
2114	0.963	0.926	0.926
2115	0.889	0.744333	0.963
2116	0.7779	0.778	1
2117	1	0.889	1
2118	0.963	0.926	0.889
2119	1	0.889	0.926
2120	1	0.963	1
2121	1	0.889	0.963
2122	0.926	0.852	0.852
2123	0.926	0.963	1
2124	0.963	1	0.963
	0.949121	0.912264	0.938333
	0.0521265	0.0649161	0.0552761
	0.0106403	0.013251	0.0112832
false alarms of critical lures
Subject ID	BS	OFB	PFB
2101	0.222333	0.0556667	0
2102	0.5	0.444333	0.333333
2103	0.277667	0.167	0.166667
2104	0.388667	0.277667	0.111
2105	0.222333	0.0556667	0.0556667
2106	0.277667	0.222333	0.277667
2107	0.5	0.166667	0.222333
2108	0.444333	0.111333	0.222333
2109	0.333333	0.111	0.277667
2110	0.5	0.111333	0.111333
2111	0.444333	0.111333	0
2112	0.555667	0.166667	0.111333
2113	0.444333	0.222	0.278
2114	0.611	0.444333	0.333333
2115	0.444333	0.277667	0.166667
2116	0.555433	0.222333	0.222333
2117	0.111333	0	0
2118	0.555667	0.222333	0.0556667
2119	0.333333	0.166667	0.0556667
2120	0.333	0.166667	0.0556667
2121	0.278	0.0556667	0.111333
2122	0.588667	0.111333	0.0556667
2123	0.555667	0	0
2124	0.555333	0.166667	0.222333
	0.418018	0.169028	0.143583
	0.137675	0.114004	0.109782
	0.0281028	0.0232709	0.0224092
false alarms of new items
Subject ID	BS	OFB	PFB
2101	0	0	0
2102	0.037	0	0
2103	0.037	0	0
2104	0	0	0
2105	0	0	0
2106	0	0	0.037
2107	0.037	0	0.037
2108	0	0.037	0
2109	0	0	0.037
2110	0	0	0
2111	0	0	0
2112	0	0	0
2113	0	0	0.037
2114	0	0	0
2115	0	0	0
2116	0.074	0	0
2117	0	0	0
2118	0	0	0.037
2119	0	0	0
2120	0	0	0
2121	0.037	0	0
2122	0	0	0.074
2123	0.037	0	0.0555
2124	0.037	0	0
	0.0123333	0.00154167	0.0131042
	0.0208924	0.00755259	0.0221458
	0.00426465	0.00154167	0.00452048
Discriminability (A')_Item-specific
Subject ID	BS	OFB	PFB
2101	0.944417	0.986083	1
2102	0.851697	0.846746	0.89959
2103	0.899425	0.932705	0.945632
2104	0.864807	0.883499	0.949222
2105	0.930387	0.986083	0.986083
2106	0.883499	0.887183	0.883499
2107	0.875	0.919831	0.916186
2108	0.868002	0.937465	0.887183
2109	0.882257	0.949222	0.850798
2110	0.851697	0.949125	0.960688
2111	0.825107	0.960688	0.9815
2112	0.861083	0.958333	0.960688
2113	0.868002	0.901902	0.867181
2114	0.817602	0.846746	0.882257
2115	0.825107	0.818253	0.945632
2116	0.696599	0.857189	0.944417
2117	0.972167	0.97225	1
2118	0.834928	0.916186	0.95496
2119	0.916667	0.919831	0.965381
2120	0.91675	0.945632	0.986083
2121	0.9305	0.95496	0.960688
2122	0.796097	0.925696	0.944485
2123	0.808347	0.99075	1
2124	0.83503	0.958333	0.930387
	0.864799	0.925196	0.941773
	0.0580721	0.0476754	0.04369
	0.0118539	0.00973171	0.00891819
Discriminability (A')_Gist
Subject ID	BS	OFB	PFB
2101	0.805583	0.763917	0.5
2102	0.851697	0.861083	0.833333
2103	0.779165	0.79175	0.791667
2104	0.847167	0.819417	0.77775
2105	0.805583	0.763917	0.763917
2106	0.819417	0.805583	0.779165
2107	0.851697	0.791667	0.756509
2108	0.861083	0.686214	0.805583
2109	0.833333	0.77775	0.779165
2110	0.875	0.777833	0.777833
2111	0.861083	0.777833	0.5
2112	0.888917	0.791667	0.777833
2113	0.861083	0.8055	0.779292
2114	0.90275	0.861083	0.833333
2115	0.861083	0.819417	0.791667
2116	0.846669	0.805583	0.805583
2117	0.777833	0.5	0.5
2118	0.888917	0.805583	0.588678
2119	0.833333	0.791667	0.763917
2120	0.83325	0.791667	0.763917
2121	0.779292	0.763917	0.777833
2122	0.897167	0.777833	0.412715
2123	0.868002	0.5	0.5
2124	0.867905	0.791667	0.805583
	0.845709	0.767606	0.71522
	0.0363095	0.0890513	0.130827
	0.00741164	0.0181775	0.0267049
Response bias (B"D)_Item-specific
Subject ID	BS	OFB	PFB
2101	-1	-1	1
2102	-0.75051	-0.565514	-0.723633
2103	-0.490702	-0.339957	-0.591668
2104	-0.552319	-0.340484	-0.18035
2105	-0.658269	-1	-1
2106	-0.340484	-0.156541	-0.340484
2107	-1	-0.169256	-0.432338
2108	-0.747774	-0.00131174	-0.156541
2109	-0.528634	-0.18035	-0.141722
2110	-0.75051	-0.181618	-0.470444
2111	-0.428908	-0.470444	1
2112	-1	-1	-0.470444
2113	-0.747774	-0.272802	-0.228327
2114	-0.739263	-0.565514	-0.528634
2115	-0.428908	-0.0262663	-0.591668
2116	-0.176688	-0.000535917	-1
2117	-1	1	1
2118	-0.747774	-0.432338	0.304873
2119	-1	-0.169256	0.131769
2120	-1	-0.591668	-1
2121	-1	0.304873	-0.470444
2122	-0.558852	0.120683	0.411544
2123	-0.565514	1	1
2124	-0.747807	-1	-0.658269
	-0.706695	-0.251596	-0.172366
	0.240427	0.529156	0.646033
	0.049077	0.108014	0.131871
Response bias (B"D)_gist
Subject ID	BS	OFB	PFB
2101	1	1	1
2102	0.75051	1	1
2103	0.698297	1	1
2104	1	1	1
2105	1	1	1
2106	1	1	0.698297
2107	0.75051	1	0.658269
2108	1	0.470444	1
2109	1	1	0.698297
2110	1	1	1
2111	1	1	1
2112	1	1	1
2113	1	1	0.698486
2114	1	1	1
2115	1	1	1
2116	0.565549	1	1
2117	1	1	1
2118	1	1	0.192031
2119	1	1	1
2120	1	1	1
2121	0.698486	1	1
2122	1	1	0.131769
2123	0.747774	1	1
2124	0.747807	1	1
	0.914956	0.977935	0.878214
	0.139691	0.108095	0.250254
	0.0285143	0.0220649	0.0510828

## Sheet: Study2_DAyoung
hit
Subject ID	Baseline	OFB	PFB
2201	0.963	0.926	0.926
2202	1	0.889	0.963
2203	0.704	0.815	0.815
2204	0.963	0.926	0.926
2205	1	1	0.889
2206	0.815	0.741	0.852
2207	0.926	0.889	0.963
2208	1	0.963	1
2209	0.963	0.889	0.963
2210	1	0.889	0.889
2211	0.926	0.704	0.778
2212	0.963	0.926	1
2213	0.889	0.852	0.963
2214	0.815	0.889	0.963
2215	0.963	0.926	0.963
2216	1	0.963	0.926
2217	0.963	0.889	0.926
2218	0.889	0.852	0.926
2219	0.926	0.926	0.926
2220	1	0.889	0.963
	0.9334	0.88715	0.926
	0.078351	0.0704842	0.057571
	0.0175198	0.0157608	0.0128733
false alarms of critical lures
Subject ID	Baseline	OFB	PFB
2201	0.777667	0.278	0.444667
2202	0.277667	0.0556667	0.388667
2203	0.388667	0.333333	0.444333
2204	0.611	0.277667	0.448
2205	0.277667	0	0.277667
2206	0.444333	0.111333	0.333
2207	0.222333	0.111333	0.444333
2208	0.167	0.111333	0.388667
2209	0.666667	0.166667	0.333333
2210	0.833	0.667	0.888867
2211	0.0556667	0.111	0.222333
2212	0.5	0.278	0.167
2213	0.5	0.333333	0.503333
2214	0.555667	0.167	0.277667
2215	0.167	0.0556667	0.0556667
2216	0.7811	0.277667	0.611333
2217	0.0556667	0.0556667	0.278
2218	0.333333	0.111	0.222333
2219	0.555433	0.333333	0.555433
2220	0.277667	0.167	0.333333
	0.422377	0.2001	0.380898
	0.238203	0.152327	0.179745
	0.0532639	0.0340614	0.0401922
false alarms of new items
Subject ID	Baseline	OFB	PFB
2201	0	0.037	0
2202	0	0	0
2203	0.037	0	0.074
2204	0.074	0	0
2205	0	0.037	0.037
2206	0	0.037	0
2207	0.0555	0	0
2208	0	0	0.037
2209	0.074	0	0.037
2210	0	0.111	0.074
2211	0.037	0	0
2212	0	0	0.037
2213	0	0	0.037
2214	0	0	0
2215	0	0	0
2216	0	0	0
2217	0	0	0
2218	0.037	0	0.037
2219	0	0	0
2220	0.037	0.037	0
	0.017575	0.01295	0.0185
	0.026488	0.0275709	0.0254651
	0.00592289	0.00616504	0.00569418
Discriminability (A')_Item-specific
Subject ID	Baseline	OFB	PFB
2201	0.756509	0.899323	0.846636
2202	0.930583	0.95496	0.883969
2203	0.740932	0.828376	0.780468
2204	0.817602	0.899425	0.845535
2205	0.930583	1	0.883499
2206	0.780468	0.889576	0.846816
2207	0.916186	0.937465	0.868002
2208	0.95825	0.960688	0.902833
2209	0.79918	0.919831	0.89959
2210	0.79175	0.729096	0.500337
2211	0.965381	0.877343	0.857189
2212	0.851697	0.899323	0.95825
2213	0.803893	0.846691	0.850708
2214	0.725462	0.919724	0.915111
2215	0.945541	0.965381	0.975753
2216	0.804725	0.915111	0.787355
2217	0.975753	0.95496	0.899323
2218	0.864637	0.92581	0.916186
2219	0.808431	0.882257	0.808431
2220	0.930583	0.919724	0.89959
	0.854907	0.906253	0.856279
	0.0819113	0.0584017	0.0975895
	0.0183159	0.013059	0.0218217
Discriminability (A')_gist
Subject ID	Baseline	OFB	PFB
2201	0.944417	0.779292	0.861167
2202	0.819417	0.763917	0.847167
2203	0.817495	0.833333	0.808347
2204	0.8647	0.819417	0.862
2205	0.819417	0.5	0.779165
2206	0.861083	0.686214	0.83325
2207	0.731753	0.777833	0.861083
2208	0.79175	0.777833	0.817495
2209	0.882257	0.791667	0.79918
2210	0.95825	0.864751	0.949183
2211	0.588678	0.77775	0.805583
2212	0.875	0.8195	0.728359
2213	0.875	0.833333	0.852685
2214	0.888917	0.79175	0.819417
2215	0.79175	0.763917	0.763917
2216	0.945275	0.819417	0.902833
2217	0.763917	0.763917	0.8195
2218	0.79918	0.77775	0.756509
2219	0.888858	0.833333	0.888858
2220	0.779165	0.728359	0.833333
	0.834314	0.775164	0.829452
	0.0850505	0.0763816	0.0522326
	0.0190179	0.0170794	0.0116796
Response bias (B"D)_Item-specific
Subject ID	Baseline	OFB	PFB
2201	-0.658269	-0.490982	-0.565564
2202	-1	0.304873	-0.739192
2203	-0.0655193	-0.191549	-0.24172
2204	-0.739263	-0.490702	-0.566057
2205	-1	1	-0.340484
2206	-0.24172	0.319678	-0.275741
2207	-0.432338	-0.00131174	-0.747774
2208	-1	-0.470444	-1
2209	-0.723633	-0.169256	-0.723633
2210	-1	-0.384775	-0.000525244
2211	0.131769	0.357272	-0.000535917
2212	-0.75051	-0.490982	-1
2213	-0.433984	-0.275972	-0.750501
2214	-0.24172	-0.170032	-0.698297
2215	-0.592187	0.131769	-0.192031
2216	-1	-0.698297	-0.552319
2217	-0.192031	0.304873	-0.490982
2218	-0.384988	0.121975	-0.432338
2219	-0.565549	-0.528634	-0.565549
2220	-1	-0.170032	-0.723633
	-0.594497	-0.0996264	-0.530344
	0.353002	0.417268	0.286437
	0.0789336	0.093304	0.0640492
Response bias (B"D)_Gist
Subject ID	Baseline	OFB	PFB
2201	1	0.698486	1
2202	1	1	1
2203	0.739192	1	0.565514
2204	0.552428	1	1
2205	1	-1	0.698297
2206	1	0.470444	1
2207	0.53471	1	1
2208	1	1	0.739192
2209	0.528634	1	0.723633
2210	1	0.384775	0.180858
2211	0.192031	1	1
2212	1	1	0.592187
2213	1	1	0.750501
2214	1	1	1
2215	1	1	1
2216	1	1	1
2217	1	1	1
2218	0.723633	1	0.658269
2219	1	1	1
2220	0.698297	0.592187	1
	0.848446	0.807295	0.845423
	0.237073	0.468674	0.225091
	0.0530112	0.104799	0.0503319
